# Supplementary material for: Anti-Hypoxic Molecular Mechanisms of Rhodiola crenulata Extract in Zebrafish as Revealed by Metabonomics
Source: Front Pharmacol. 2019 Nov 12;10:1356. doi: 10.3389/fphar.2019.01356 (PMC6861209; doi:10.3389/fphar.2019.01356)
Supplement: Supplementary file 2 [file DataSheet_2.xls]

## Sheet: Compound information
Table S2 Mass spectrum information of differential metabolites as tentatively identified by HMDB KEGG and LipidMaps databases
Compound ID	Compound Name	Mode	Adducts	Formula	Mass Error (ppm)	Isotope Similarity	Fragement ions	Neutral mass (Da)	m/z	Retention time (min)	FDR
HMDB00562	Creatinine	Positive	2M+H	C4H7N3O	-2.05438	95.5294	146.113		227.125	9.54372	0.000504192
HMDB32525	Tetradec-2-enal	Positive	M+NH4	C14H26O	-3.66068	96.8854	102.0902, 88.0747		228.231	9.27562	0.0443347
HMDB09196	PE(18:4(6Z,9Z,12Z,15Z)/20:0)	Positive	M+H	C43H78NO8P	3.8244	85.6046	737.5104, 645.5420, 613.5166		768.557	8.91097	0.0491891
HMDB09375	PE(20:3(8Z,11Z,14Z)/22:6(4Z,7Z,10Z,13Z,16Z,19Z))	Positive	M+H	C47H76NO8P	-0.088913	82.599	651.5330, 421.2759, 341.3036		814.538	8.26428	0.0180802
HMDB07179	DG(18:0/22:6(4Z,7Z,10Z,13Z,16Z,19Z)/0:0)	Positive	M+H-H2O	C43H72O5	-2.32689	96.5105	421.2759, 341.3051		651.533	8.26428	0.040046
HMDB07972	PC(16:0/18:1(9Z))	Positive	M+H	C42H82NO8P	1.89172	92.1879	599.5002, 184.0738, 86.0956	759.579	760.587	8.04738	0.00125344
HMDB08725	PC(22:6(4Z,7Z,10Z,13Z,16Z,19Z)/16:0)	Positive	M+Na	C46H80NO8P	1.93175	96.6128	769.4789, 645.4848, 478.3282		828.553	5.76597	5.14244e-07
HMDB00067	Cholesterol	Positive	M+H-H2O	C27H46O	-2.06993	97.4731	161.1308, 147.1154		369.351	5.70097	5.8911e-11
HMDB28791	Glutaminyl-Arginine	Positive	M+H	C11H22N6O4	-1.2129	96.3941	303.1752, 227.1028		303.177	5.33588	4.4968e-09
HMDB28725	Asparaginyl-Arginine	Positive	M+H	C10H20N6O4	-0.847059	97.2781	289.1613, 145.0621		289.162	4.63398	9.80633e-09
HMDB12450	PS(22:6(4Z,7Z,10Z,13Z,16Z,19Z)/22:6(4Z,7Z,10Z,13Z,16Z,19Z))	Positive	M+H	C50H74NO10P	3.31031	97.2712	789.4518, 695.5040	879.508	880.515	3.59498	0.0136694
HMDB07788	DG(22:6(4Z,7Z,10Z,13Z,16Z,19Z)/22:6(4Z,7Z,10Z,13Z,16Z,19Z)/0:0)	Positive	M+H-H2O	C47H68O5	0.636937	97.7851	665.4548, 385.2731, 269.2247		695.504	3.59498	0.024308
HMDB00254	Succinic acid	Positive	M+NH4	C4H6O4	0.0561556	95.3065	150.9691, 140.9834	118.027	259.011	3.44667	1.97587e-09
HMDB28951	Lysyl-Glycine	Positive	M+H	C8H17N3O3	-3.91761	99.9006	194.0440, 158.1278		204.133	2.1119	0.0117281
HMDB11149	LysoPC(O-18:0)	Positive	M+H	C26H56NO6P	-1.03391	97.666	104.106	509.384	510.391	2.08437	0.0351759
HMDB02278	2-(acetylamino)-1,5-anhydro-2-deoxy-3-O-b-D-galactopyranosyl-D-arabino-Hex-1-enitol	Positive	M+NH4	C14H23NO10	-1.16209	92.1267	355,0672, 270.3117, 146.9795		383.166	17.7563	3.5186e-12
HMDB01072	Coenzyme Q10	Positive	M+H-H2O	C59H90O4	-0.866802	61.5119	643.4690, 617.4547		845.68	17.7425	9.69857e-06
HMDB35780	8-Hydroxy-4(6)-lactarene-5,14-diol	Positive	M+Na	C15H26O3	-0.189827	94.8618	235.1668, 159.0767, 131.0459		277.177	16.1672	0.0181882
HMDB06463	Stearidonyl carnitine	Positive	2M+H	C25H41NO4	-1.60648	78.9019	81.0693	419.303	839.712	15.5715	4.964e-07
HMDB08569	PC(22:1(13Z)/20:0)	Positive	M+H	C50H98NO8P	3.57542	98.2449	711.6243, 608.4625	871.706	872.713	14.0337	0.01618
HMDB08578	PC(22:1(13Z)/22:1(13Z))	Positive	M+H	C52H100NO8P	2.38856	81.9788	737.639	897.721	898.728	13.9825	0.0480222
HMDB07993	PC(16:0/24:1(15Z))	Positive	M+H	C48H94NO8P	2.82105	97.3187	844.6803, 808.6001,109.0999	843.674	844.681	13.5625	0.0173701
HMDB12095	SM(d18:0/24:1(15Z))	Positive	M+H	C47H95N2O6P	-2.34545	95.7084	658.543		815.698	13.4975	0.0367471
HMDB10712	Galactosylceramide (d18:1/24:1(15Z))	Positive	M+H	C48H91NO8	-0.663456	89.303	792.6078, 701.5174	809.674	832.666	13.1465	0.0193478
HMDB08603	PC(22:2(13Z,16Z)/20:1(11Z))	Positive	M+H	C50H94NO8P	2.56366	86.2909	685.6119, 519.3654	867.674	868.681	13.1189	0.0447707
HMDB08595	PC(22:2(13Z,16Z)/18:0)	Positive	M+H	C48H92NO8P	3.11429	97.8189	706.5371, 681.5764, 287.2335	841.659	842.666	12.9987	0.0325075
HMDB11406	PE(P-18:1(11Z)/18:0)	Positive	M+H	C41H80NO7P	1.04783	90.6964	705.5312, 462.3072, 307.2981		730.575	12.8744	0.0179694
HMDB13430	PC(o-18:1(9Z)/20:0)	Positive	M+Na	C46H92NO7P	-2.29792	83.4087	752.5587, 675.5772, 333.2771		824.649	12.7956	0.0494785
HMDB13466	SM(d18:0/22:1(13Z)(OH))	Positive	M+H	C45H89N2O7P	2.5123	66.7549	737.547		801.65	12.5787	0.0159242
HMDB08520	PC(20:5(5Z,8Z,11Z,14Z,17Z)/24:1(15Z))	Positive	M+H	C52H92NO8P	0.73457	83.4038	729.561		890.664	11.8768	0.0468941
HMDB00569	Deoxypyridinoline	Positive	2M+H	C18H28N4O7	-0.823437	80.979	657.3255, 609.2937		825.398	10.786	0.0373007
HMDB09084	PE(18:1(9Z)/P-18:1(9Z))	Positive	M+H	C41H78NO7P	-3.66209	88.035	605.5504, 504.3445, 124.9988		728.556	10.597	0.0434361
HMDB01260	ADP-Ribosyl-L-arginine	Positive	M+Na	C21H35N9O15P2	4.50833	75.0094	451.225		738.165	10.3798	0.028516
HMDB09252	PE(20:1(11Z)/15:0)	Positive	M+H-H2O	C40H78NO8P	1.1324	95.8255	459.2504, 307.2991		714.544	10.1908	0.0401038
HMDB09412	PE(20:4(5Z,8Z,11Z,14Z)/P-18:0)	Positive	M+H	C43H78NO7P	3.13891	87.889	611.5382, 466.3276		752.561	10.1258	0.0310787
HMDB01397	Guanosine monophosphate	Positive	M+H	C10H14N5O8P	-3.3018	88.9528	364.0635, 152.0555, 137.0449		364.064	1.97785	0.0314009
HMDB00848	Stearoylcarnitine	Positive	M+H	C25H49NO4	-2.07055	98.2214	428.3724, 369.2977		428.373	1.69602	5.38375e-07
HMDB00125	Glutathione	Positive	M+Na	C10H17N3O6S	-1.12902	97.079	330.0711, 162.0203	307.083	308.091	1.6407	0.00187359
HMDB06210	Heptadecanoyl carnitine	Positive	M+H	C24H47NO4	-2.28354	97.3075	259.1673, 119.0844		414.357	1.39627	0.000347031
HMDB13154	12-Hydroxy-12-octadecanoylcarnitine	Positive	M+H-H2O	C25H49NO5	-2.22873	97.9247	104.1059, 60.0808		426.357	1.31745	0.00174469
HMDB34156	Ethyl stearate	Positive	M+NH4	C20H40O2	-1.96633	98.6701	286.3084, 102.1277		330.336	1.2346	0.0129577
HMDB06469	Linoleyl carnitine	Positive	M+H	C25H45NO4	-3.97268	95.9588	246.234		424.34	1.10047	0.0125639
HMDB11496	LysoPE(0:0/22:6(4Z,7Z,10Z,13Z,16Z,19Z))	Positive	M+H	C27H44NO7P	-1.05801	92.9886	505.2320, 425.2665, 383.2573	525.285	526.292	1.07285	0.0445193
HMDB00827	Stearic acid	Positive	M+NH4	C18H36O2	-2.762	98.6455	240.2674, 86.0593		302.305	0.966417	0.00186069
HMDB00269	Sphinganine	Positive	M+H-H2O	C18H39NO2	-2.49123	97.7537	102.0903, 86.0593		284.294	0.952617	0.00107158
HMDB06461	Linoelaidyl carnitine	Positive	M+Na	C25H45NO4	4.70932	94.6097	328.3200, 249.1834		446.326	0.9388	0.018337
HMDB00290	Uridine diphosphate-N-acetylglucosamine	Positive	M+Na	C17H27N3O17P2	0.294463	87.3842	562.9383, 326.9544		630.071	0.79085	0.0175301
HMDB04610	Phytosphingosine	Positive	M+H-H2O	C18H39NO3	-2.28576	96.014	256.2629, 112.0744		300.289	0.79095	0.0163069
HMDB01241	2-Aminomuconic acid	Positive	2M+H	C6H7NO4	3.9906	88.5033	150.0650, 89.0609		315.084	0.708	0.0406411
HMDB11687	Phenylbutyrylglutamine	Positive	M+H-H2O	C15H20N2O4	2.97305	96.9177	200.200, 118.0826		275.14	0.6706	1.68317e-07
HMDB00195	Inosine	Positive	M+Na	C10H12N4O5	-1.47466	98.058	198.0606, 170.0318, 159.0280		291.07	0.601567	0.000279225
HMDB00086	Glycerophosphocholine	Positive	M+Na	C8H20NO6P	-0.636423	97.8061	221.018		280.092	0.601567	3.40667e-06
HMDB11342	PE(P-16:0/18:1(9Z))	Negative	M-H	C39H76NO7P	0.838629	96.0606	349.273		700.529	9.93677	0.00308032
HMDB12316	3-O-Sulfogalactosylceramide (d18:1/22:0)	Negative	M-H	C46H89NO11S	-0.206397	89.4198	174.956		862.608	9.7613	0.00343385
HMDB12234	Histidinal	Negative	2M-H	C6H9N3O	4.24961	86.2271	277.1430, 156.8896		277.143	9.43797	0.0294002
HMDB09709	PE(22:6(4Z,7Z,10Z,13Z,16Z,19Z)/P-18:0)	Negative	M-H	C45H78NO7P	2.43824	86.4733	464.3136, 229.1961		774.546	9.23487	0.0031977
HMDB28821	Glutamyl-Histidine	Negative	M-H	C11H15N4O5-	-1.22765	96.2549	204.1008, 158.9894		282.097	8.93898	0.0499159
HMDB09286	PE(20:2(11Z,14Z)/16:0)	Negative	M-H	C41H78NO8P	1.18768	89.235	269.247		742.54	8.88392	0.0169598
HMDB07928	PC(14:1(9Z)/P-16:0)	Negative	M-H	C38H74NO7P	0.294204	92.8352	452.277		686.513	8.6392	0.00220329
HMDB09055	PE(18:1(9Z)/16:0)	Negative	M-H2O-H	C39H76NO8P	0.352188	90.1294	450.2980, 321.2422	717.531	762.545	8.41252	0.00342245
HMDB11418	PE(P-18:1(11Z)/20:4(5Z,8Z,11Z,14Z))	Negative	M-H	C43H76NO7P	1.50358	95.4984	446.303		748.53	8.30205	0.00165348
HMDB09694	PE(22:6(4Z,7Z,10Z,13Z,16Z,19Z)/20:3(5Z,8Z,11Z))	Negative	M+FA-H	C47H76NO8P	1.06741	93.52	524.2779, 327.2318		858.53	8.1816	0.00351306
HMDB11229	PC(P-16:0/22:6(4Z,7Z,10Z,13Z,16Z,19Z))	Negative	M-H	C46H80NO7P	-2.41806	84.2483	327.2318, 229.1945		788.558	8.12637	0.0449573
HMDB08235	PC(18:4(6Z,9Z,12Z,15Z)/18:1(11Z))	Negative	M-H2O-H	C44H78NO8P	1.60391	73.58	281.247		760.53	8.01993	0.0171219
HMDB08656	PC(22:5(4Z,7Z,10Z,13Z,16Z)/14:0)	Negative	M-H2O-H	C44H78NO8P	2.15509	87.6465	450.298		760.53	7.6828	0.0347867
HMDB09414	PE(20:4(5Z,8Z,11Z,14Z)/P-18:1(9Z))	Negative	M-H	C43H76NO7P	1.06662	95.7823	715.5764, 450.2979		748.529	7.66898	0.0113231
HMDB09114	PE(18:2(9Z,12Z)/P-16:0)	Negative	M-H	C39H74NO7P	0.171793	89.8226	698.5129, 450.2979		698.513	7.65518	0.0137419
HMDB09478	PE(20:5(5Z,8Z,11Z,14Z,17Z)/P-18:0)	Negative	M-H	C43H76NO7P	0.456436	92.2271	728.558		748.529	7.30422	0.0298197
HMDB09710	PE(22:6(4Z,7Z,10Z,13Z,16Z,19Z)/P-18:1(11Z))	Negative	M-H	C45H76NO7P	2.47905	87.3635	462.2979, 444.2862		772.531	7.12875	0.0403391
HMDB09649	PE(22:5(7Z,10Z,13Z,16Z,19Z)/16:0)	Negative	M-H2O-H	C43H76NO8P	1.8146	89.4801	267.231		746.514	6.96708	0.0340223
HMDB09418	PE(20:4(8Z,11Z,14Z,17Z)/16:0)	Negative	M-H	C41H74NO8P	1.89117	95.4686	452.277		738.509	6.67115	0.0159858
HMDB09685	PE(22:6(4Z,7Z,10Z,13Z,16Z,19Z)/18:1(11Z))	Negative	M+FA-H	C45H76NO8P	4.17132	95.9837	747.4994, 419.2559		834.532	5.90408	0.0306648
HMDB00036	Taurocholic acid	Negative	M-H	C26H45NO7S	-0.112696	78.1553	170.96		514.284	4.79577	0.0437789
HMDB08436	PC(20:4(5Z,8Z,11Z,14Z)/18:3(9Z,12Z,15Z))	Negative	M+FA-H	C46H78NO8P	3.92411	87.3337	788.5257, 303.2317		848.548	4.56925	0.00180136
HMDB08496	PC(20:5(5Z,8Z,11Z,14Z,17Z)/16:1(9Z))	Negative	M+FA-H	C44H76NO8P	3.3748	95.8206	762.5097, 301.2161		822.532	4.13532	0.0211675
HMDB08731	PC(22:6(4Z,7Z,10Z,13Z,16Z,19Z)/18:3(6Z,9Z,12Z))	Negative	M+FA-H	C48H78NO8P	3.14142	98.7754	812.526		872.547	4.08007	0.01332
HMDB08733	PC(22:6(4Z,7Z,10Z,13Z,16Z,19Z)/18:4(6Z,9Z,12Z,15Z))	Negative	M+FA-H	C48H76NO8P	3.69181	95.6378	810.5100, 275.1999		870.532	3.5811	0.0245238
HMDB05764	Melanostatin	Negative	2M+FA-H	C13H24N4O3	0.0206147	85.8369	569.3408, 339.1984, 228.8918		613.368	2.98943	0.00147924
HMDB01228	L-Glutamic acid 5-phosphate	Negative	2M+FA-H	C5H10NO7P	2.75922	83.1106	170.961		499.038	2.35657	1.34055e-06
HMDB01416	Pantetheine 4'-phosphate	Negative	M-H	C11H23N2O7PS	-2.92615	93.7513	310.005		357.088	2.01942	0.0435079
HMDB08816	PC(24:1(15Z)/24:1(15Z))	Negative	M-H	C56H108NO8P	3.51351	88.622	694.67		952.777	14.4679	7.86154e-06
HMDB08800	PC(24:1(15Z)/20:0)	Negative	M+FA-H	C52H102NO8P	3.46733	94.7597	884.716		944.736	14.4679	0.00481889
HMDB08585	PC(22:1(13Z)/24:1(15Z))	Negative	M+FA-H	C54H104NO8P	4.07703	90.4138	910.732		970.752	14.4265	0.000254836
HMDB09765	PE(24:1(15Z)/22:0)	Negative	M+FA-H	C51H100NO8P	3.18018	88.9875	870.699		930.72	14.2648	0.000341748
HMDB04956	Ceramide (d18:1/24:0)	Negative	M+FA-H	C42H83NO3	-3.66327	93.8017	648.628		694.633	14.2372	0.000828501
HMDB04977	Glucosylceramide (d18:1/26:0)	Negative	M+FA-H	C50H97NO8	2.81085	92.5061	838.716		884.722	14.2096	0.00135272
HMDB03474	3,5-Diiodo-L-tyrosine	Negative	2M+FA-H	C9H9I2NO3	3.99132	67.9128	864.7317, 736.6824		910.736	14.1584	8.76e-05
HMDB08091	PC(18:1(11Z)/24:0)	Negative	M+FA-H	C50H98NO8P	2.93424	95.7062	856.6824, 367.3568		916.704	14.0479	0.00146195
HMDB08323	PC(20:1(11Z)/24:1(15Z))	Negative	M+FA-H	C52H100NO8P	3.3261	95.2324	882.699		942.72	14.0105	0.00247894
HMDB0004976	Glucosylceramide (d18:1/26:1(17Z))	Negative	M+FA-H	C50H95NO8	-4.81923	86.9201	393.373		882.7	14.0105	0.0350099
HMDB09245	PE(20:0/24:1(15Z))	Negative	M+FA-H	C49H96NO8P	2.81886	93.3897	842.669		902.688	13.8212	0.00194035
HMDB09766	PE(24:1(15Z)/22:1(13Z))	Negative	M+FA-H	C51H98NO8P	3.28299	94.6742	868.6819, 379.3559		928.704	13.7936	0.0011004
HMDB00140	Glucosylceramide	Negative	M-H	C48H93NO8	-2.8317	94.2248	808.67	811.688	856.69	13.7384	0.0305645
HMDB04952	Ceramide (d18:1/22:0)	Negative	M+FA-H	C40H79NO3	-0.0598025	93.2349	620.599		666.604	13.7108	0.00111652
HMDB10713	Galactosylceramide (d18:1/26:1(17Z))	Negative	M+FA-H	C50H95NO8	2.82678	95.422	836.701		882.706	13.697	0.00151884
HMDB04953	Cer(d18:1/24:1(15Z))	Negative	M+FA-H	C42H81NO3	-4.08473	92.0943	571.4835, 221.0839		692.617	13.697	0.00144046
HMDB08557	PC(22:0/P-18:1(9Z))	Negative	M-H	C48H94NO7P	-0.984837	90.4316	826.673	827.676	872.685	13.6043	0.0013789
HMDB08307	PC(20:1(11Z)/20:0)	Negative	M+FA-H	C48H94NO8P	1.61824	96.8372	828.6536, 339.3268		888.671	13.5767	0.000147537
HMDB08092	PC(18:1(11Z)/24:1(15Z))	Negative	M+FA-H	C50H96NO8P	4.04022	95.9386	854.6674, 365.3417		914.689	13.5491	0.00129293
HMDB09280	PE(20:1(11Z)/P-18:0)	Negative	M-H	C43H84NO7P	-0.674837	96.8973	492.345		756.591	13.4427	2.79347e-05
HMDB09750	PE(24:1(15Z)/18:0)	Negative	M+FA-H	C47H92NO8P	-0.483945	93.2612	814.6363, 812.6578		874.654	13.3086	0.00135737
HMDB09535	PE(22:1(13Z)/22:1(13Z))	Negative	M+FA-H	C49H94NO8P	3.32517	97.7178	840.6512, 351.3255		900.673	13.281	0.00139353
HMDB08389	PC(20:3(5Z,8Z,11Z)/24:1(15Z))	Negative	M+FA-H	C52H96NO8P	0.898968	84.426	878.666		938.686	13.2119	4.4895e-05
HMDB04974	Glucosylceramide (d18:1/22:0)	Negative	M+FA-H	C46H89NO8	-1.00439	94.7876	632.521		828.656	13.1843	0.00127793
HMDB08158	PC(18:2(9Z,12Z)/24:1(15Z))	Negative	M+FA-H	C50H94NO8P	1.64766	87.3995	852.6502, 279.2316		912.671	13.1193	9.65222e-05
HMDB11151	PC(O-16:0/18:2(9Z,12Z))	Negative	M-H	C42H82NO7P	-3.21294	96.5904	279.232		742.573	13.0917	0.00192223
HMDB08454	PC(20:4(5Z,8Z,11Z,14Z)/24:1(15Z))	Negative	M+FA-H	C52H94NO8P	4.23558	65.6163	876.65		936.674	13.0365	0.0001679
HMDB07896	PC(14:0/P-18:0)	Negative	M-H	C40H80NO7P	1.12092	95.6343	269.247		716.561	13.0227	0.00145216
HMDB08026	PC(16:1(9Z)/24:1(15Z))	Negative	M+FA-H	C48H92NO8P	3.69333	96.8011	826.6363, 337.3107		886.657	12.9991	0.00339594
HMDB08036	PC(18:0/18:0)	Negative	M+FA-H	C44H88NO8P	0.751401	95.433	309.2783, 307.2626		834.624	12.9715	0.000213438
HMDB08620	PC(22:2(13Z,16Z)/P-18:0)	Negative	M-H	C48H92NO7P	-1.85338	84.5644	337.3112, 309.2799	825.66	870.665	12.9715	0.00184315
HMDB12103	SM(d18:1/22:0)	Negative	M+FA-H	C45H91N2O6P	-1.52798	62.272	771.639		831.658	12.9438	0.00148392
HMDB09282	PE(20:1(11Z)/P-18:1(9Z))	Negative	M-H	C43H82NO7P	-0.384228	92.2226	403.2603, 78.9585		754.575	12.8748	0.00107588
HMDB12319	3-O-Sulfogalactosylceramide (d18:1/26:1(17Z))	Negative	M-H	C50H95NO11S	2.36086	88.1793	357.2786, 174.9967		916.657	12.5377	0.0271977
HMDB11241	PC(P-18:0/18:0)	Negative	M+FA-H	C44H88NO7P	2.66401	94.3012	758.608		818.63	12.4588	0.0260193
HMDB11307	PC(P-18:1(9Z)/18:0)	Negative	M+FA-H	C44H86NO7P	2.3765	89.3517	756.5926, 492.3450		816.614	11.9186	0.0436095
HMDB00988	S-Adenosylmethioninamine	Negative	M-H	C14H23N6O3S+	3.24035	92.3855	247.1688, 275.1665		354.149	11.7846	0.00803492
HMDB28772	Cysteinyl-Cysteine	Negative	2M-H	C6H12N2O3S2	-4.82763	84.6154	227.1998, 225.0025		447.048	11.5676	0.000262165
HMDB00564	PC(16:0/16:0)	Negative	M+FA-H	C40H80NO8P	-0.767837	95.4742	778.5572, 718.5381, 297.2424, 227.1998		778.56	11.4986	0.0291595
HMDB11269	PC(P-18:1(11Z)/14:0)	Negative	M-H	C40H78NO7P	0.514989	93.4822	450.298		714.545	10.9071	0.00323213
HMDB04950	Ceramide (d18:1/18:0)	Negative	M+FA-H	C36H71NO3	-0.672456	94.1415	564.535		610.541	10.8656	0.00936347
HMDB08019	PC(16:1(9Z)/22:1(13Z))	Negative	M+FA-H	C46H88NO8P	2.89626	94.9329	798.6039, 309.2787		858.625	10.6388	0.0160684
HMDB09064	PE(18:1(9Z)/20:0)	Negative	M-H	C43H84NO8P	1.53389	89.0644	508.3403, 281.2473		772.587	10.5836	0.0433266
HMDB07939	PC(15:0/18:1(9Z))	Negative	M-H2O-H	C41H80NO8P	0.301784	95.3275	241.216		726.545	10.5146	0.000457634
HMDB08907	PE(15:0/22:0)	Negative	M+FA-H	C42H84NO8P	4.38132	94.3769	746.573		806.595	10.2601	0.0323111
HMDB08975	PE(16:1(9Z)/22:2(13Z,16Z))	Negative	M-H	C43H80NO8P	-1.22973	96.1014	265.216		768.554	10.1261	0.00478953
HMDB11303	PC(P-18:1(9Z)/14:1(9Z))	Negative	M-H	C40H76NO7P	0.640851	94.2083	321.242		712.529	10.1122	0.00152399
HMDB10602	PG(18:0/18:0)	Negative	M-H	C42H83O10P	-0.774668	69.1054	726.545		777.565	10.0984	0.00112383
HMDB11376	PE(P-18:0/18:2(9Z,12Z))	Negative	M-H	C41H78NO7P	1.00774	94.4219	712.5291, 464.3138, 446.3031		726.545	10.057	0.00322345
HMDB09445	PE(20:4(8Z,11Z,14Z,17Z)/P-18:0)	Negative	M-H	C43H78NO7P	1.94697	94.3238	464.3138, 303.2318, 259.2416		750.546	10.0156	0.00077552
HMDB02183	Docosahexaenoic acid	Negative	M-H	C22H32O2	-2.81037	98.3503	327.2320, 247.1688	328.239	327.232	1.83	0.000440607
HMDB05765	Ophthalmic acid	Negative	2M-H	C11H19N3O6	0.558715	86.4314	557.2474, 533.2194		577.248	1.81633	0.00120241
HMDB01876	Epinephrine sulfate	Negative	2M-H	C9H13NO6S	-0.329108	56.2815	476.9544, 310.0316		525.085	1.5068	0.000681363
HMDB11134	5-HETE	Negative	M-H	C20H32O3	-3.72633	90.3586	319.2265, 203.1791	320.234	319.227	1.19713	0.024391
HMDB10210	15-KETE	Negative	M-H	C20H30O3	1.93489	93.7077	275.165	318.22	317.211	1.02167	0.027225
HMDB28884	Histidinyl-Glutamate	Negative	M-H	C11H15N4O5-	-2.89767	98.1489	264.0842, 238.1055		282.096	0.846183	0.0130997
HMDB00208	Oxoglutaric acid	Negative	M+FA-H	C5H6O5	1.58511	76.9927	175.024	146.022	337.058	0.749417	0.00977732
HMDB00965	Hypotaurine	Negative	2M+FA-H	C2H7NO2S	3.95857	62.5037	203.0528, 71.0139		263.039	0.58775	0.00307488
HMDB13220	Beta-Citryl-L-glutamic acid	Negative	M-H2O-H	C11H15NO10	-2.61593	96.7959	282.0954, 264.0842, 238.1055		302.051	0.57395	0.000859828
HMDB00634	Citraconic acid	Negative	M-H2O-H	C5H6O4	-4.51866	95.3646	78.9579		111.008	0.57395	0.0003358
HMDB01176	Cytidine monophosphate N-acetylneuraminic acid	Negative	M-H	C20H31N4O16P	-3.56899	95.9327	346.0523, 110.0232		613.138	0.560133	3.02585e-09
HMDB00095	Cytidine monophosphate	Negative	M-H	C9H14N3O8P	-0.797284	41.9273	96.0080, 78.9579		322.044	0.560133	0.0015006
